# Supplementary material
Source: Springer Nature journal article supplement (https://www.springermedizin.de/resource/supplementary/13054_2005_3674_MOESM5_ESM.pdf/9721026)

Probability of in-hospital death

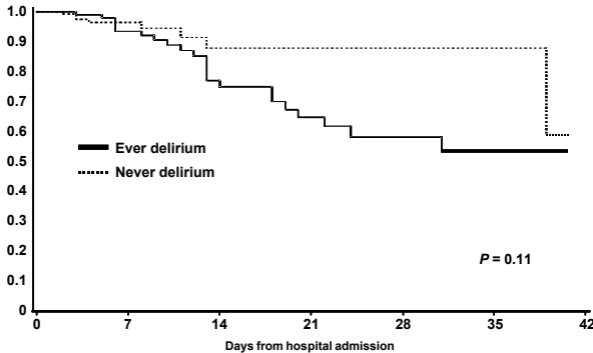

| Group          | No. at risk | 7  | 14 | 21 | 28 | 35 | 42 |
|----------------|-------------|----|----|----|----|----|----|
| Ever delirium  | 125         | 74 | 36 | 23 | 14 | 11 | 6  |
| Never delirium | 135         | 57 | 22 | 11 | 7  | 4  | 1  |

Supplement: MOESM5 [file 9721026]
